# Supplementary material for: Interaction of Pestiviral E1 and E2 Sequences in Dimer Formation and Intracellular Retention
Source: MDPI journal article supplement (doi:10.3390/ijms22147285), 2021-07-06
Supplement: s1 [file s1]

CLUSTAL O(1.2.4) multiple sequence alignment

|                                                 |                                                               |     |
|-------------------------------------------------|---------------------------------------------------------------|-----|
| E1 KJ950914.1 Pestivirus_J_NrPV/NYC-D23         | NKIYCEKFHVLGDLVYVNSCLPMGLPTGARFVSKNVISLEPEKTAQIIIPRLTHHLDSGIL | 60  |
| E1 EF100713.2 Porcine_Bungowannah               | -SPYCPVAKRVFNIIYTNMCTPLGLPDKSKIIGPGTFDISGR-DEFIFPKLPYHVDDFIL  | 58  |
| E1 AY781152.3 Pronghorn_antelope_pestivirus     | SEVYCKVEKRVGSLWYTRNCTPACLPGHTEILGAGVFDTNPQ-GRSLIPRLPGHITEAVI  | 59  |
| E1 FJ527854.1 BVDV_XJ-04                        | ASPYCDVERKIGYIWYTKNCTPACLPNTRIIGPGKFDTNAE-DGKILHEMGGHLSFVL    | 59  |
| E1 LC006970.1 BVDV_2_KZ-91-CP                   | ASPYCDVERKIGYIWYTKNCTPACLPNRTKIIGPGKFDTNAE-DGKILHEMGGHLSFVL   | 59  |
| E1 GQ888686.2 BVDV_2_JZ05-1                     | ASPYCEVERKIGYIWYTKNCTPACLPNRTKIIGPGKFDTNAE-DGKILHEMGGHLSFAL   | 59  |
| E1 KX096718.1 BVDV_2_HB-1511                    | ASPYCDVERKIGYIWYTKNCTPACLPNTRIIGPGKFDTNAE-DGKILHEMGGHLSFVL    | 59  |
| E1 JF714967.1 BVDV_2_HLJ-10                     | ASPYCNVERKIGYIWYTKNCTPACLPNTRIIGPGKFDTNAE-DGKILHEMGGHLSFVL    | 59  |
| E1 KT875169.1 BVDV_2_91W                        | ASPYCDVERKIGYIWYTKNCTPACLPNTRIIGPGKFDTNAE-DGKILHEMGGHLSFAL    | 59  |
| E1 HQ258810.1 BVDV_SH-28                        | ASPYCDVERKIGYIWYTKNCTPACLPNTRIIGPGKFDTNAE-DGKILHEMGGHLSFVL    | 59  |
| E1 KT832818.1 BVDV_2_USMARC-60765               | ASPYCDVERKIGYIWYTKNCTPACLPKNTRIIGPGKFDTNAE-DGKILHEMGGHLSFVL   | 59  |
| E1 AB567658.1 BVDV_Hokudai-Lab/09               | ASPYCDVEKKIGYVWYTKNCTPACLPKNTKIIGPGKFDTNAE-DGKIIHEMGGHLSFVL   | 59  |
| E1 KJ000672.1 BVDV_2_SD1301                     | ASPYCNVEKKIGYIWYTRNCTPACLPKNTKIIGPGKFDTNAE-DGKIIHEMGGHLSFAL   | 59  |
| E1 JQ799141.1 BVDV_1_sichuan                    | ASPYCNVERKLGYVWYTKNCTPACLPKNTKIIGPGMFDTNAE-DGKILHEMGGHLSFIL   | 59  |
| E1 AB078950.1 BVDV_1_KS86-1ncp                  | ASPYCEVKKIGYIWYTNCTPACLPKNTKIIGPGKFDTNAD-DGKILYEMGGHLSVLL     | 59  |
| E1 JN400273.1 BVDV_1_SD0803                     | ASPYCAVERKIGYIWF TKNCTPACLPKNTRIVGPGKFDTNAD-DGKILHEMGGHLSVLL  | 59  |
| E1 KX987157.1 BVDV_1_SLO/1170/2000              | ASPYCDVERKIGYIWYTKNCTPACLPNRTKIVGPGKFDTNAD-DGKILHEMGGHLSVLL   | 59  |
| E1 LT631725.1 BVDV_1_UM/126/07                  | ASPYCNVERKIGYIWF TKNCTPACLPKNTKIVGPGKFDTNAD-DGKILHEMGGHLSVLL  | 59  |
| E1 KF896608.1 BVDV_1_Bega-like                  | ASPYCDVERKLGYIWF TKNCTPACLPKNTKIVGPGMFDTNAD-DDKILHEMGGHLSVLL  | 59  |
| E1 M96751.1 BVDV_1_SD1                          | ASPYCDVDRKIGYIWF TKNCTPACLPKNTKIIGPGKFDTNAE-DGKILHEMGGHLSVLL  | 59  |
| E1 KC757383.1 BVDV_1_10JJ-SKR                   | SSPYCDVERKLGYIWF TKNCTPACLPKNTKIVGPGKFDTNAE-DGKIMHEMGGHLSVLL  | 59  |
| E1 AF526381.3 BVDV_1_ZM-95                      | ASPYCEVERKIGYIWYTKNCTPACLPKNTKIVGPGRFDTNAE-DGKILHEMGGHLSVLL   | 59  |
| E1 KP941591.1 BVDV_1_USMARC-55925               | ASPYCEVERRLGYVWYTKNCTPACLPNRTKIIGPGRFDTNAE-DGKILHEMGGHLSVLL   | 59  |
| E1 LC089876.1 BVDV_1_Shitara/02/06              | ASPYCDVDRKVGYIWYTKNCTPACLPKNTMIIGPGKFDTNAE-DGKILHEMGGHLSMLL   | 59  |
| E1 KC853441.1 BVDV_1_SuwaCp                     | ATPYCEVEQKIGYIWT KNCTPACLPKNTKIVGPGKFDTNAE-DGKILHEMGGHLSVLL   | 59  |
| E1 KX577637.1 BVDV_1_SLO/2407/2006              | ATPYCEVDRKLGYIWYTKNCTPACLPGNTKIVGPGKFDTNAE-DGKIIHEMGGHVSEVLL  | 59  |
| E1 KP313732.1 BVDV_1_Carlito                    | ATPYCEVERKLGYVWYTKNCTPACLPGNTKIVGPGKFDTNAE-DGKILHEMGGHLSVLL   | 59  |
| E1 FJ040215.1 BVDV_3_Th/04_KhonKaen             | ATPYCNVSRKIGYVWYTNMCTPACLPNMNTRIVGPGKFDTNAD-DGKILHEMGGHLSLAI  | 59  |
| E1 KC297709.1 BVDV_3_LVRI/cont-1                | ATPYCNINKRIGYVWYTNMCTPACLPKNPRIVGPGKFDTNAD-DGKILHEMGSHLSELT I | 59  |
| E1 KC788748.1 BVDV_3_Italy-129/07               | ATPYCNINKKIGYVWYTNMCTPACLPKNTRIVGPGKFDTNAD-DGKILHEMGSHLSELA I | 59  |
| E1 JX469119.1 BVDV_3_JS12/01                    | ATPYCNINKKIGYVWYTNMCTPACLPKNTRIMGPGKFDTNAD-DGKILHEMGSHLSELA I | 59  |
| E1 JX985409.1 BVDV_3_CH-KaHo/cont               | ATPYCNINKKIGYVWYTNMCTPACLPKNTRIVGPGKFDTNAD-DGKILHEMGSHLSELA I | 59  |
| E1 AB871953.1 BVDV_3_D32/00_'HoBi' like         | ATPYCNINKKIGYVWYTNMCTPACLPKNTRIVGPGKFDTNAD-DGKILHEMGSHLSELA I | 59  |
| E1 HQ231763.1 BVDV_3_Italy-1/10-1               | ATPYCNINKKIGYVWYTNMCTPACLPKNTRIVGPGKFDTNAD-DGKILHEMGSHLSELA I | 59  |
| E1 JQ612704.1 BVDV_3_Italy-83/10-ncp            | ATPYCNINKKIGYVWYTNMCTPACLPKNTRIVGPGKFDTNAD-DGKILHEMGSHLSELA I | 59  |
| E1 NC_018713.1 BVDV_3_LV03/12                   | ATPYCNINKKIGYVWYTNMCTPACLPKNTRIVGPGKFDTNAD-DGKILHEMGSHLSELA I | 59  |
| E1 KJ660072.1 Pestivirus_PG-2                   | -SPYCEVNRKLGYIWYTNMCTPACLPGNTKIIGPGKFDTNAE-DGKILHELGGHISEFLL  | 58  |
| E1 MH410816.1 Pestivirus_PG-2_GIRAFFE           | -SPYCEVNRKLGYIWYTNMCTPACLPGNTKIIGPGKFDTNAE-DGKILHELGGHISEFLL  | 58  |
| E1 AF144617.2 Pestivirus_giraffe-1_H138         | ASPYCEVNKKLGYIWYTNMCTPACLPGNTKIIGPGKFDTNAE-DGKILHELGGHLSFIL   | 59  |
| E1 KJ463422.1 BDV_FNK2012-1                     | QSPYCNVTRKIGYIWYTNMCTPACLPNRTKIIGPGKFDTNAE-DGKILHEMKGHISEFIL  | 59  |
| E1 U70263.1 BDV_BD31                            | QSPYCNVTRKIGYIWYTNMCTPACLPKNTKIIGPGKFDTNAE-DGKILHEMKGHISEFIL  | 59  |
| E1 KF925348.1 BDV_Coos_Bay-5_nc                 | QSPYCNVTRKIGYIWYTNMCTPACLPKNTKIIGPGKFDTNAE-DGKILHEMKGHISEFIL  | 59  |
| E1 AB897785.1 BDV_X818                          | QSPYCNVTRKIGYVWYTNMCTPACLPKNTKIIGPGKFDTNAE-DGKILHEMRGHISEFIL  | 59  |
| E1 AF144618.2 Pestivirus_reindeer-1_V60-Krefeld | QSPYCNVTKKLGYIWYTNMCTPACLPNRTKIVGPGKFDTNAE-DGKILHEMRGHISEFLL  | 59  |
| E1 KC963426.1 BDV_JSLS12-01                     | QSPYCNVTRKIGYIWYTNMCTPACLPGNTKIIGPGKFDTNAE-DGKILHEMRGHISEFLL  | 59  |
| E1 AF407339.1 BDV_Aveyron                       | QSPYCNVTKKLGYIWYTNMCTPACLPKNTKIIGPGKFDTNAE-DGKILHEMRGHISEFLL  | 59  |
| E1 AY646427.1 CSFV_94.4/IL/94/TWN               | MSPYCNVTRKVGYIWNMCTPACLPKNTKIIGPGKFDTNAE-DGKILHEMGGHLSFLL     | 59  |
| E1 KP233070.1 CSFV_GXF29/2013                   | MSPYCNVTRKIGYIWYTNMCTPACLPKNTKIIGPGKFDTNAE-DGKILHEMGGHLSFLL   | 59  |
| E1 KC851953.1 CSFV_IND/UK/LAL-290               | MSPYCNVTRKIGYIWYTNMCTPACLPKNTKIIGPGKFDTNAE-DGKILHEMGGHLSFLL   | 59  |
| E1 AF407339.1 CSFV_39                           | MSPYRNVTRKIGYIWYTNMCTPACLPNRTKIIGPGKFDTNAE-DGKILHEMGGHLSFLL   | 59  |
| E1 FJ529205.1 CSFV_Zj0801                       | MSPYCNVTRKIGYIWYTNMCTPACLPNTKIIGPGKFDTNAE-DGKILHEMGGHLSFLL    | 59  |
| E1 KJ619377.1 CSFV_Bergen                       | MSPYCNVTRKIGYIWYTNMCTPACLPKNTKIIGPGKFDTNAE-DGKILHEMGGHLSFLL   | 59  |
| E1 KU504339.1 CSFV_GD19/2011                    | MSPYCNVTRKVGYIWNMCTPACLPKNTKIIGPGKFDTNAE-DGKILHEMGGHLSFLL     | 59  |
| E1 KM362426.1 CSFV_IND/AS/GHY/G4                | MSPYCNVTRKIGYIWYTNMCTPACLPKNTKIIGPGKFDTNAE-DGKILHEMGGHLSFLL   | 59  |
| E1 GQ923951.1 CSFV_SXCDK                        | MSPYCNVTRKIGYIWYTNMCTPACLPKNTKIIGPGKFDTNAE-DGKILHEMGGHLSFLL   | 59  |
| E1 J04358.2 CSFV_Alfort/Tuebingen               | MSPYCNVTRKIGYIWYTNMCTPACLPKNTKIIGPGKFDTNAE-DGKILHEMGGHLSFLL   | 59  |
| E1 AY259122 CSFV_Alfort/Tuebingen               | MSPYCNVTRKIGYIWYTNMCTPACLPKNTKIIGPGKFDTNAE-DGKILHEMGGHLSFLL   | 59  |
| E1 KF669877.1 CSFV_JJ9811                       | LSPYCNVTSKIGYIWYTNMCTPACLPKNTRIIGPGKFDTNAE-DGKILHEMGGHLSFLL   | 59  |
| E1 X87939.1 CSFV_Alfort/187                     | LSPYCNVTSKIGYIWYTNMCTPACLPKNTKIIGPGKFDTNAE-DGKILHEMGGHLSFLL   | 59  |
| E1 X87939 CSFV_Alfort/187                       | LSPYCNVTSKIGYIWYTNMCTPACLPKNTKIIGPGKFDTNAE-DGKILHEMGGHLSFLL   | 59  |
| E1 KJ660072.1 CSFV_Riems                        | LSPYCNVTSKIGYIWYTNMCTPACLPKNTKIIGPGKFDTNAE-DGKILHEMGGHLSFLL   | 59  |
| E1 GU270877.1 BDV_H2121_Chamois-1               | QSPYCNVTKKIGYVWYTSNCTPACLPKNTKIIGPGKFDTNAE-DGKILHEMKGHVSEFLL  | 59  |
| E1 KF918753.1 BDV_Gifhorn_genotype-3            | QSPYCNVTRKIGYIWYTNMCTPACLPGNTKIIGPGKFDTNAE-DGKILHEMRGHISEFLL  | 59  |
| E1 JX428945.1 Pestivirus_Aydin/04-TR            | QSPYCNVTRRIGYIWYTNMCTPACLPNRTKIIGPGKFDTNAE-DGKILHEMGGHISEFLL  | 59  |
| E1 AF037405.1 Pestivirus_Aydin/04-TR            | QSPYCNVTRRIGYIWYTNMCTPACLPNRTKIIGPGKFDTNAE-DGKILHEMGGHISEFLL  | 59  |
| E1 KM408491.1 Pestivirus_Burdur/05-TR           | QSPYCNVTRKIGYIWYTNMCTPACLPKNTKIIGPGKFDTNAE-DGKILHEMGGHISEFLL  | 59  |
|                                                 | * : : . * * ** :. . :. : :. : *                               |     |
| E1 KJ950914.1 Pestivirus_J_NrPV/NYC-D23         | LVLVAMSDFMPETSSALYLILHFMIPNSRHRTISEEGLTMALNLTSTEPVSSVIPTSVYV  | 120 |
| E1 EF100713.2 Porcine_Bungowannah               | LSLIAMSDFAPETSSIIYALHYLMPNSDNDRDFVMDLDPNKLNLATKSVASVPTSVNV    | 118 |
| E1 AY781152.3 Pronghorn_antelope_pestivirus     | LSLVALSEVMPETSSALYIALHYFLHMPN--ETIGYCDKNQLNLITTTVDKVIPNSVYV   | 117 |
| E1 FJ527854.1 BVDV_XJ-04                        | LSLVVLSDFAPETASAIYLVLFHFAIPQSH--ISVDTCDKNQLNITVAITVAEVIPGSVWN | 117 |
| E1 LC006970.1 BVDV_2_KZ-91-CP                   | LSLVVLSDFAPETASVIYLVLFHTIPQSY--VSVDTCDKNQLNLTVATTVAEVIPGSVWN  | 117 |
| E1 GQ888686.2 BVDV_2_JZ05-1                     | LSLVVLSDFAPETASVIYLVLFHFAIPQSH--INVDTCDKSQLNLTVATTVAEVIPGTVWN | 117 |
| E1 KX096718.1 BVDV_2_HB-1511                    | LSLVVLSDFAPETSSAIYLVLFHFAIPQSH--VNVDTCDKNQLNLTVATTVAEVIPGSVWN | 117 |



|                                                 |                                                                 |     |
|-------------------------------------------------|-----------------------------------------------------------------|-----|
| E1 JF714967.1 BVDV_2_HLJ-10                     | LSLVVLSDFAPETASVIYLVLFHFAIPQSH--VSVDTCDKNQNLNTVATTVAEVIPGTWVN   | 117 |
| E1 KT875169.1 BVDV_2_91W                        | LSLVVLSDFAPETASAIYLVLFHVIPQSH--VSVDTCDKNQNLNTVATTVAEVIPGTWVN    | 117 |
| E1 HQ258810.1 BVDV_SH-28                        | LSLVVLSDFAPETASVIYLVLFHFAIPQNH--VNVDTCDKNQNLNTVATTVAEVIPGSWVN   | 117 |
| E1 KT832818.1 BVDV_2_USMARC-60765               | LSLVVLSDFAPETASVIYLVLFHFAIPQNH--INVDTCDKNQNLNTVATTVAEVIPGSWVN   | 117 |
| E1 AB567658.1 BVDV_Hokudai-Lab/09               | LSLVVLSDFAPESASVIYLVLFHYAIPQNH--AEVTTCDKNQNLNTVTTTTADVIPGSWVN   | 117 |
| E1 KJ000672.1 BVDV_2_SD1301                     | LSLVVLSDFSPEATASVIYLVLFHYVIPQNH--VEVTTCDKNQNLNTIATTTADVIPGSWVN  | 117 |
| E1 JQ799141.1 BVDV_1_sichuan                    | LSLVVLSDFAPETASALYLVLFHTIPQSH--TPVMDCKSQLNLTVGLTTADVVPSSWVN     | 117 |
| E1 AB078950.1 BVDV_1_KS86-1ncp                  | LSLVVMSDFAPETASAIYLVLFHSIPQSH--TEVSDCKSQLNLTVGLTTADVIPGSWVN     | 117 |
| E1 JN400273.1 BVDV_1_SD0803                     | MSLVVLSDFAPETASVVYLVLFHSIPQGH--TDVLDCDKGQNLNLTVGLRTEDVIPGSWVN   | 117 |
| E1 KX987157.1 BVDV_1_SLO/1170/2000              | LSLVVLSDFAPETASAVYLVLFHSIPQSH--SDILDCDKNQNLNLTVELTTEQVIPGSWVN   | 117 |
| E1 LT631725.1 BVDV_1_UM/126/07                  | LSLVVLSDFAPETASVMYLVLFHFIPQSH--IDVSDCKNQNLNLTIGLKTDDVWPNWVN     | 117 |
| E1 KF896608.1 BVDV_1_Bega-like                  | LSLVVLSDFAPETASAMYLILHFSIPQSH--TDITDCDKNQNLNLTIGLTTADMVPGSWVN   | 117 |
| E1 M96751.1 BVDV_1_SD1                          | LSLVVLSDFAPETASAMYLILHFSIPQSH--VDITDCDKTQNLNLTIELTTADVIPGSWVN   | 117 |
| E1 KC757383.1 BVDV_1_10JJ-SKR                   | LSLVVLSDFAPETASTLYLVLFHSIPQRH--TDILDCDKSQLNLTVGVTTADVIPGSWVN    | 117 |
| E1 AF526381.3 BVDV_1_ZM-95                      | LSLVVLSDFAPETASVAYLALHFGIPQRH--TEVLDCDKNQNLNLTVGVTTEDVIPGSWVN   | 117 |
| E1 KP941591.1 BVDV_1_USMARC-55925               | LSVVVLSDFAPETASLIYLVLFHSIPQGH--TDIHDCKRNQNLNLTVELTTAEVIPGSWVN   | 117 |
| E1 LC089876.1 BVDV_1_Shitara/02/06              | LSLVVMSDFAPETASVIYLVLFHSIPQGH--TEVLDCDKNQNLNLTVGLTTADVIPGSWVN   | 117 |
| E1 KC853441.1 BVDV_1_SuwaCp                     | LSLVVLSDFAPETASVIYLVLFHTVPQSH--TDVLDCDKNQNLNLTIIGVTTADVIPGSWVN  | 117 |
| E1 KX577637.1 BVDV_1_SLO/2407/2006              | LSLVVLSDFAPETASVVYLVLFHSIPQRH--TDILDCDKNQNLNLTVELTTADVIPGSWVN   | 117 |
| E1 KP313732.1 BVDV_1_Carlito                    | LSLVVLSDFAPETASVMYLVLFHSIPQSH--TDILDCDKDQNLNLTVKLTADVIPGSWVN    | 117 |
| E1 FJ040215.1 BVDV_3_Th/04_KhonKaen             | LALVMSDFAPESASVLYLVLFHSIPQAH--EEVDQCDKNQNLNLTVGLRTDEVWVPSSWVN   | 117 |
| E1 KC297709.1 BVDV_3_LVRI/cont-1                | LALVMSDFAPESASVLYLVLFHSIPQAH--EEVDQCDRNQNLNLTVSLRTDEVWVPSSWVN   | 117 |
| E1 KC788748.1 BVDV_3_Italy-129/07               | LALVMSDFTPESTSVLYLVLFHSIPQAH--EEVDQCDRNQNLNLTVSLRTDEVWVPSSWVN   | 117 |
| E1 JX469119.1 BVDV_3_JS12/01                    | LALVMSDFAPESASVLYLVLFHSIPQAH--EEVDQCDRNQNLNLTVSLRTDEVWVPSSWVN   | 117 |
| E1 JX985409.1 BVDV_3_CH-KaHo/cont               | LALVMSDFAPESASVLYLVLFHSIPQAH--EEVDQCDRNQNLNLTVSLRTDEVWVPSSWVN   | 117 |
| E1 AB871953.1 BVDV_3_D32/00_'HoBi'-like         | LALVMSDFAPESASVLYLVLFHSIPQAH--EEVDQCDRNQNLNLTVGLRTDEVWVPSSWVN   | 117 |
| E1 HQ231763.1 BVDV_3_Italy-1/10-1               | LALVMSDFAPESASVLYLVLFHSIPQAH--EEVDQCDRNQNLNLTVSLRTDEVWVPSSWVN   | 117 |
| E1 JQ612704.1 BVDV_3_Italy-83/10-ncp            | LALVMSDFAPESASVLYLVLFHSIPQAH--EEVDQCDRNQNLNLTVSLRTDEVWVPSSWVN   | 117 |
| E1 NC_018713.1 BVDV_3_LV03/12                   | LALVMSDFAPESASVLYLVLFHSIPQAH--EEVDQCDRNQNLNLTVSLRTDEVWVPSSWVN   | 117 |
| E1 KJ660072.1 Pestivirus_PG-2                   | LSLVVLSDFAPETASAIYLVLFHYTIPQKH--EVVENCMDNQNLNLTVTKRVKDVIPSSWVN  | 116 |
| E1 MH410816.1 Pestivirus_PG-2_GIRAFFE           | LSLVVLSDFAPETASAIYLVLFHYTIPQKH--EVVENCMDNQNLNLTVTKRVKDVIPSSWVN  | 116 |
| E1 AF144617.2 Pestivirus_giraffe-1_H138         | LSLVVLSDFAPETASAIYLVLFHYTMPQKY--EVVGSCKRNQNLNLTVKTRVEDVIPSSWVN  | 117 |
| E1 KJ463422.1 BDV_FNK2012-1                     | LSLVVLSDFAPETASTLYLVLFHTLPQTY--EVPSGCDTNQNLNLTVDLRVDDVIPSSWVN   | 117 |
| E1 U70263.1 BDV_BD31                            | LSLVVLSDFAPETASTLYLVLFHTLPQTY--EVPSECDTNQNLNLTVGLRVDDVIPSSWVN   | 117 |
| E1 KF925348.1 BDV_Coos_Bay-5_nc                 | LSLVVLSDFAPETASTLYLVLFHTLPQTY--EVPNECDTSQNLNLTVGLRVDDVIPSSWVN   | 117 |
| E1 AB897785.1 BDV_X818                          | LSLVVLSDFAPETASTLYLVLFHALPQTH--EVPSVCDTNQNLNLTVSLRVDDVIPSSWVN   | 117 |
| E1 AF144618.2 Pestivirus_reindeer-1_V60-Krefeld | LSLVVLSDFAPETASTLYLVLFHTIPQSH--EAPSECDTNQNLNLTIGLRVDEVWVPSSWVN  | 117 |
| E1 KC963426.1 BDV_JSLS12-01                     | LSLVILSDFAPETASSLYLVLFHFAIPQSH--EIPDGCDTNQNLNLTVNLRVEDVIPSSWVN  | 117 |
| E1 AF407339.1 BDV_Aveyron                       | LSLVVLSDFAPETASALYLVLFHFAIPQSH--ENPSSCDTNQNLNLTTGLKVEDVIPSSWVN  | 117 |
| E1 AY646427.1 CSFV_94.4/IL/94/TWN               | LSLVVLSDFAPETASALYLVLFHYTIPQIH--EVPEDCDTNQNLNLTVELRTEDWVPSSWVN  | 117 |
| E1 KP233070.1 CSFV_GXF29/2013                   | LSLVILSDFAPETASTLYLVLFHYAVPQSY--GEPEGCDTNQNLNLTVGLRTQDVWVPSSWVN | 117 |
| E1 KC851953.1 CSFV_IND/UK/LAL-290               | LSLVILSDFAPETASTLYLVLFHYAIPQSH--EEPESCDTNQNLNLTVGLKTEDWVPSSWVN  | 117 |
| E1 AF407339.1 CSFV_39                           | LSLVILSDFAPETASTLYLVLFHYAIPQSH--EEPEGCDTNQNLNLTVGLKTEDWVPSSWVN  | 117 |
| E1 FJ529205.1 CSFV_Zj0801                       | LSLVILSDFAPETASTLYLVLFHYAIPQSH--EEPEGCDTNQNLNLTVGLRTEDWVPSSWVN  | 117 |
| E1 KJ619377.1 CSFV_Bergen                       | LSLVILSDFAPETASTLYLVLFHYAIPQSH--DEPEGCDTNQNLNLTVGLRTEDWVPSSWVN  | 117 |
| E1 KU504339.1 CSFV_GD19/2011                    | LSLVILSDFAPETASTLYLVLFHYAIPQSH--EEPEGCDTNQNLNLTVGLRTEDWVPSSWVN  | 117 |
| E1 KM362426.1 CSFV_IND/AS/GHY/G4                | LSLVILSDFAPETASTLYLVLFHYAIPQPH--KEPEGCDTNQNLNLTVGLRTEDWVPSSWVN  | 117 |
| E1 GQ923951.1 CSFV_SXCDK                        | LSLVILSDFAPETASTLYLVLFHYAIPQSH--EEPEGCDTNQNLNLTVGLRTEDVIPSSWVN  | 117 |
| E1 J04358.2 CSFV_Alfort/Tuebingen               | LSLVILSDFAPETASTLYLVLFHYAIPQSH--EEPEGCDTNQNLNLTVKLRTEDWVPSSWVN  | 117 |
| E1 AY259122 CSFV_Alfort/Tuebingen               | LSLVILSDFAPETASTLYLVLFHYAIPQSH--EEPEGCDTNQNLNLTVKLRTEDWVPSSWVN  | 117 |
| E1 KF669877.1 CSFV_JJ9811                       | LSLVVLSDFAPETASTLYLVLFHYAIPQVH--KEPDGCDTNQNLNLTVELRTEDWVPSSWVN  | 117 |
| E1 X87939.1 CSFV_Alfort/187                     | LSLVVLSDFAPETASALYLVLFHYVIPQSH--EEPEGCDTNQNLNLTVELRTEDVIPSSWVN  | 117 |
| E1 X87939 CSFV_Alfort/187                       | LSLVVLSDFAPETASALYLVLFHYVIPQSH--EEPEGCDTNQNLNLTVELRTEDVIPSSWVN  | 117 |
| E1 KJ660072.1 CSFV_Riems                        | LSLVVLSDFAPETASALYLVLFHYVIPQPH--DEPEGCDTNQNLNLTVELRTEDVIPSSWVN  | 117 |
| E1 GU270877.1 BDV_H2121_Chamois-1               | LSLVILSDFAPETASTLYLVLFHTIPQSY--ESPDDCDTNQNLNLTVSLKVEDVIPSSWVN   | 117 |
| E1 KF918753.1 BDV_Gifhorn_genotype-3            | LSLVVLSDFAPETASVLYLVLFHSIPQGY--ESPDQCDMNQNLNLTVDLKVEDVIPSSWVN   | 117 |
| E1 JX428945.1 Pestivirus_Aydin/04-TR            | LSLVVLSDFAPETASAIYLVLFHTIPQSY--ENPKDCDKNQNLNLTIGLRTEDWVPSSWVN   | 117 |
| E1 AF037405.1 Pestivirus_Aydin/04-TR            | LSLVVLSDFAPETASAIYLVLFHTIPQSY--ENPKDCDKNQNLNLTIGLRTEDWVPSSWVN   | 117 |
| E1 KM408491.1 Pestivirus_Burdur/05-TR           | LSLVVLSDFAPETASALYLVLFHTIPQSY--ENPADCDKNQNLNLTVGLKTEDWVPSSWVN   | 117 |
|                                                 | : :: :*: . **::* *: ::: : **:* . :::* :*                        |     |

|                                             |                                                                 |     |
|---------------------------------------------|-----------------------------------------------------------------|-----|
| E1 KJ950914.1 Pestivirus_J_NrPV/NYC-D23     | EGQWTCWKPSWWPYNADIALFFEGAFEMLELIARAVGDLMKVWTEATAVAFLCFLIKAFR    | 180 |
| E1 EF100713.2 Porcine_Bungowannah           | LGEWVCVKPSWWPYSAEITNLIGGVI TVADLVIKTIEELLNLWTEATAVAFLAALIKIFR   | 178 |
| E1 AY781152.3 Pronghorn_antelope_pestivirus | LGQWVCVKPGWWPYDSEVTLVVNEVINVLIDIGGRAARVLLQVWDAATAIAVLIFIMKVAR   | 177 |
| E1 FJ527854.1 BVDV_XJ-04                    | LGKYVCIRPNWWPYETTAVFVLEEAGQVVKLGLRAIRDLTRIWNAAATTTAFLVFLVKVLR   | 177 |
| E1 LC006970.1 BVDV_2_KZ-91-CP               | LGKYVCIRPDWWPYETATVFVLEEAGQVVKLGLRAIRDLTRIWNAAATTTAFLVFLVKALR   | 177 |
| E1 GQ888686.2 BVDV_2_JZ05-1                 | LGKYVCIRPDWWPYETTTFVFLLEEAGQVIKLGRLAIRDLTRIWNAAATTTAFLVFLVKVLR  | 177 |
| E1 KX096718.1 BVDV_2_HB-1511                | LGKYVCIRPDWWPYETTTLVLVLEEAGQVVKLGLRAIRDLTRIWNAAATTTAFLVFLVKVLR  | 177 |
| E1 JF714967.1 BVDV_2_HLJ-10                 | LGKYVCIRPDWWPYETTTFVFLLEEAGQVVKLGLRAIRDLTRIWNAAATTTAFLVFLVKVLR  | 177 |
| E1 KT875169.1 BVDV_2_91W                    | LGKYVCIRPDWWPYETTTFVFLLEEAGQVVKLGLRAIRDLTRIWNAAATTTAFLVFLVKVLR  | 177 |
| E1 HQ258810.1 BVDV_SH-28                    | LGKYVCIRPDWWPYETTTFVFLLEEAGQVVKLGLRAIRDLTRIWNAAATTIAFLVFLVGALR  | 177 |
| E1 KT832818.1 BVDV_2_USMARC-60765           | LGRYVCIRPDWWPYETTTFVFLLEEAGQVVKLGLRAIRDLTRIWNAAATTTAFLVFLVKVLR  | 177 |
| E1 AB567658.1 BVDV_Hokudai-Lab/09           | LGKYVCIRPDWWPYETATVFALEEAGQVVKLGLRAIRDLTRIWNAAATTTAFLVFLVKVLR   | 177 |
| E1 KJ000672.1 BVDV_2_SD1301                 | LGKYVCIRPDWWPYETTTFVFALEEAGQVVKLGMRAIRDLTRIWNAAATTIAFLVFLVKVLR  | 177 |
| E1 JQ799141.1 BVDV_1_sichuan                | LGKWVCVRPDWWPYETATVLLFEEAGQVVKIALRAVRDITRIWNAAATTTAFLVCLVRVAR   | 177 |
| E1 AB078950.1 BVDV_1_KS86-1ncp              | IGRYVCIRPDWWPYETTTLVVVEEVSQVVKLVLRRAIRDLTRIWDAAATSTAFLVCLVKVVR  | 177 |
| E1 JN400273.1 BVDV_1_SD0803                 | LGRYVCIRPNWWPYETTTLVAFEEIGQVIKIALRALRDLTRIWNAAATATAFLVCLVKVVR   | 177 |
| E1 KX987157.1 BVDV_1_SLO/1170/2000          | LGRYVCIRPNWWPYETAPVLALEEIGQVINIVLRALRDLTRIWNAAATTTAFLVCLVKVVR   | 177 |
| E1 LT631725.1 BVDV_1_UM/126/07              | MGKYVCIRPNWWPYETTAVLAFAEEVSQVVKIVLRALRDLTRIWNAAATTTAFLVCLVKVVR  | 177 |
| E1 KF896608.1 BVDV_1_Bega-like              | LGKYVCIRPNWWPYETVTVLAFEEVGQVIKIVLRALRDLTRIWNAAATTTAFLVCLVKVVR   | 177 |
| E1 M96751.1 BVDV_1_SD1                      | LGKYVCIRPDWWPYETA AVLAFAEEVGQVVKIVLRALRDLTRIWNAAATTTAFLVCLIKMVR | 177 |



|                                                 |                                                               |     |
|-------------------------------------------------|---------------------------------------------------------------|-----|
| E1 KC757383.1 BVDV_1_10JJ-SKR                   | LGKWVCIRPDWWPYETAPVLAFAEEAGQVVRIALRALRDLTRIWNAATTTAFLVCLVKVWR | 177 |
| E1 AF526381.3 BVDV_1_ZM-95                      | LGRYVCIRPDWWPYETATVLVFEEISQVIKLVLRALRDLMRIWNAATTTAFLVCLVKVWR  | 177 |
| E1 KP941591.1 BVDV_1_USMARC-55925               | LGKYVCIRPDWWPYETATVLVFEEVGQVIKIVLRALRDLTRIWTAATTTAFLVCLVKVWR  | 177 |
| E1 LC089876.1 BVDV_1_Shitara/02/06              | LGRYVCIRPDWWPYETATVMAFAEEVGQVIKIALRALKDLTRIWNAATTTAFLVCLVKVWR | 177 |
| E1 KC853441.1 BVDV_1_SuwaCp                     | LGKYVCIRPDWWPYETAABLVFEEVGQVIKIALRALRDLTRIWNAATTTAFLVCLVKVWR  | 177 |
| E1 KX577637.1 BVDV_1_SLO/2407/2006              | LGKYVCIRPDWWPYETATVLAFAEEIGQVIKIALRALRDLTRIWNAATTTAFLVCMVKVWR | 177 |
| E1 KP313732.1 BVDV_1_Carlito                    | LGKYVCIRPDWWPYETATVLAFAEEVGQVIKIALRALRDLTRIWNAATTTAFLVCLVKVWR | 177 |
| E1 FJ040215.1 BVDV_3_Th/04_KhonKaen             | LGKWVCVRPSWWPYETATVLAFAEEIGQVLKLILRALKDLTNMWNAASTTAFLVCLVKILR | 177 |
| E1 KC297709.1 BVDV_3_LVRI/cont-1                | LGKWVCVRPPWWPYETATVLAFAEEIGQVLKLILRALKDLTNMWNAASTTAFLVCLVKILR | 177 |
| E1 KC788748.1 BVDV_3_Italy-129/07               | LGKWVCVRPPWWPYETATVLAFAEEIGQVLKLILRALKDLTNMWNAASTTAFLVCLVKILR | 177 |
| E1 JX469119.1 BVDV_3_JS12/01                    | LGKWVCVRPSWWPYETATVLAFAEEIGQVLKLILRALKDLTNMWNAASTTAFLVCLVKILR | 177 |
| E1 JX985409.1 BVDV_3_CH-KaHo/cont               | LGKWVCVRPSWWPYETATVLAFAEEIGQVLKLILRALKDLTNMWNAASTTAFLVCLVKILR | 177 |
| E1 AB871953.1 BVDV_3_D32/00_'HoBi'like          | LGKWVCVRPPWWPYETATVLAFAEEIGQVLKLILRALKDLTNMWNAASTTAFLVCLVKILR | 177 |
| E1 HQ231763.1 BVDV_3_Italy-1/10-1               | LGKWVCVRPPWWPYETATVLAFAEEIGQVLKLILRALKDLTNMWNAASTTAFLVCLVKILR | 177 |
| E1 JQ612704.1 BVDV_3_Italy-83/10-ncp            | LGKWVCVRPPWWPYETATVLAFAEEIGQVLKLILRALKDLTNMWNAASTTAFLVCLVKILR | 177 |
| E1 NC_018713.1 BVDV_3_LV03/12                   | LGKWVCVRPPWWPYETATVLAFAEEIGQVLKLILRALKDLTNMWNAASTTAFLVCLVKILR | 177 |
| E1 KJ660072.1 Pestivirus_PG-2                   | IGKYVCVRPDWWPYETTTVLIFEEISHVVKLVLRALRDLTRIWNAASTTAFLICLVKVL   | 176 |
| E1 MH410816.1 Pestivirus_PG-2_GIRAFFE           | IGKYVCVRPDWWPYETTTVLIFEEISHVVKLVLRALRDLTRIWNAASTTAFLICLVKVL   | 176 |
| E1 AF144617.2 Pestivirus_giraffe-1_H138         | IGKYVCVRPDWWPYETTTVFIFEEVSQVVKLVLRALRDLTRIWNAASTTAFLICLVKVL   | 177 |
| E1 KJ463422.1 BDV_FNK2012-1                     | LGKYVCVRPDWWPYETTIVLLFEEAGQVVKLVLRRAIRDLTRIWSASTTAFLICLIKVL   | 177 |
| E1 U70263.1 BDV_BD31                            | LGKYVCVRPDWWPYETTIVLLFEEAEQVVKLVLRRAIRDLTRVWSASTTAFLICLAKVL   | 177 |
| E1 KF925348.1 BDV_Coos_Bay-5_nc                 | LGKYVCVRPDWWPYETTIVLLFEEAEQVVKLVLRRAIRDLTRVWSASTTAFLICLVKVL   | 177 |
| E1 AB897785.1 BDV_X818                          | LGKYVCVRPDWWPYETTMVLLFEEAGQVVKLVLRRAIRDLTRVWSASTTAFLICLVKVL   | 177 |
| E1 AF144618.2 Pestivirus_reindeer-1_V60-Krefeld | LGKYVCVRPDWWPYETTIVLLCEEAGQVIKLVLRRAIRDLTRVWSASTTAFLICLIKVL   | 177 |
| E1 KC963426.1 BDV_JSLS12-01                     | LGKYVCVRPDWWPYETTAVLLFEEAGQIVKLILRAIRDLTRVWSASTTAFLICLVKVL    | 177 |
| E1 AF407339.1 BDV_Aveyron                       | LGKYVCVRPDWWPYETTIVLLFEEAGQVVKLVLRRAIRDLTRVWSASTTAFLICLVKVL   | 177 |
| E1 AY646427.1 CSFV_94.4/IL/94/TWN               | VGEYVCVRPDWWPYETKVLLFEEAGQVIKLALRAMRDLTRVWSSASTIAFLICLIKVL    | 177 |
| E1 KP233070.1 CSFV_GXF29/2013                   | IGKYVCVRPDWWPYETKVALLFEEAGQVIKLALRALRDLTRVWSASTTAFLICLIKVL    | 177 |
| E1 KC851953.1 CSFV_IND/UK/LAL-290               | IGKYVCVRPDWWPYETKVALLFEEVGQVIKLALRALRDLTRVWSASTTAFLICLIKVL    | 177 |
| E1 AF407339.1 CSFV_39                           | IGKYVCVRPDWWPYETKVALLFEEAGQVIKLALRALRDLTRVWSASTTAFLICLIKIL    | 177 |
| E1 FJ529205.1 CSFV_Zj0801                       | IGKYVCVRPDWWPYETKVALLFEEAGQVVKLALRALRDLTRVWSASTTAFLICLIKIL    | 177 |
| E1 KJ619377.1 CSFV_Bergen                       | IGKYVCVRPDWWPYETKVALLFEEAGQVIKLALRALRDLTRVWSASTTAFLICLIKTL    | 177 |
| E1 KU504339.1 CSFV_GD19/2011                    | IGKYVCVRPDWWPYETKVALLFEEAGQVIKLALRALRDLTRVWSASTTAFLICLIKIL    | 177 |
| E1 KM362426.1 CSFV_IND/AS/GHY/G4                | IGKYVCVRPDWWPYETKVALLFEEAGQVIKLVLRALRDLTRVWSASTTAFLICLIKVL    | 177 |
| E1 GQ923951.1 CSFV_SXCDK                        | IGKYVCVRPDWWPYETKVALLFEEAGQVVKLVLRALRDLTRVWSASTTAFLICLIKVL    | 177 |
| E1 J04358.2 CSFV_Alfort/Tuebingen               | IGKYVCVRPDWWPYETKVALLFEEAGQVIKLVLRALRDLTRVWSASTTAFLICLIKVL    | 177 |
| E1 AY259122 CSFV_Alfort/Tuebingen               | IGKYVCVRPDWWPYETKVALLFEEAGQVIKLVLRALRDLTRVWSASTTAFLICLIKVL    | 177 |
| E1 KF669877.1 CSFV_JJ9811                       | VGKYVCVRPDWWPYETKVALLFEEAGQVIKLALRALRDLTRVWSASTTAFLICLIKVL    | 177 |
| E1 X87939.1 CSFV_Alfort/187                     | VGKYVCVRPDWWPYETKVALLFEEAGQVVKLALRALRDLTRVWSASTTAFLICLIKVL    | 177 |
| E1 X87939 CSFV_Alfort/187                       | VGKYVCVRPDWWPYETKVALLFEEAGQVVKLALRALRDLTRVWSASTTAFLICLIKVL    | 177 |
| E1 KJ660072.1 CSFV_Riems                        | VGKYVCVRPDWWPYETEVALLFEEVGQVVKLALRALRDLTRVWSASTIAFLICLIKVL    | 177 |
| E1 GU270877.1 BDV_H2121-Chamois-1               | LEKYVCIRPYWWPYETTVALLFEEAGQVLKLALRAIRDLTRVWSASTTAFLICLVKLL    | 177 |
| E1 KF918753.1 BDV_Gifhorn_genotype-3            | LGKYVCIRPDWWPYETTIVLLFEEAGQVIKLALRAIRDLTRVWSASTTAFLICLVKVL    | 177 |
| E1 JX428945.1 Pestivirus_Aydin/04-TR            | IGKYVCIRPDWWPYETTIVLLFEEVGQVIKLALRALRDLTRVWSASTTAFLICLIKVL    | 177 |
| E1 AF037405.1 Pestivirus_Aydin/04-TR            | IGKYVCIRPDWWPYETTIVLLFEEVGQVIKLALRALRDLTRVWSASTTAFLICLIKVL    | 177 |
| E1 KM408491.1 Pestivirus_Burdur/05-TR           | LGKYVCIRPDWWPYETTIVLLFEEVGQVIKLALRALRDLTRVWSASTTAFLICLIKVL    | 177 |
|                                                 | ..* :* *****. : : :: : .* *: : * *                            |     |

|                                             |                     |     |
|---------------------------------------------|---------------------|-----|
| E1 KJ950914.1 Pestivirus_J_NrPV/NYC-D23     | GQILQGVILLLLSSAEG   | 198 |
| E1 EF100713.2 Porcine_Bungowannah           | GQPIQAVAWLIIIGGAQA  | 196 |
| E1 AY781152.3 Pronghorn_antelope_pestivirus | GQLIQGLIWLLLLTGTEA  | 195 |
| E1 FJ527854.1 BVDV_XJ-04                    | GQLIQGLLWLMLITGAQS  | 195 |
| E1 LC006970.1 BVDV_2_KZ-91-CP               | GQLIQGLLWLMLITGAQG  | 195 |
| E1 GQ888686.2 BVDV_2_JZ05-1                 | GQLIQGLLWLMLITGAQG  | 195 |
| E1 KX096718.1 BVDV_2_HB-1511                | GQLIQGLLWLMLITGAQS  | 195 |
| E1 JF714967.1 BVDV_2_HLJ-10                 | GQLIQGLLWLMLITGAQS  | 195 |
| E1 KT875169.1 BVDV_2_91W                    | GQLIQGLLWLMLITGAQS  | 195 |
| E1 HQ258810.1 BVDV_SH-28                    | GQLIQGLLWLMLITGAQG  | 195 |
| E1 KT832818.1 BVDV_2_USMARC-60765           | GQLIQGLLWLMLITGAQS  | 195 |
| E1 AB567658.1 BVDV_Hokudai-Lab/09           | GQLIQGLLWLMLITGAQG  | 195 |
| E1 KJ000672.1 BVDV_2_SD1301                 | GQLIQGLLWLMLITGVQS  | 195 |
| E1 JQ799141.1 BVDV_1_sichuan                | GQVLQGLIWLLLITGAQG  | 195 |
| E1 AB078950.1 BVDV_1_KS86-1ncp              | GQVLQGILWLLLISGVQG  | 195 |
| E1 JN400273.1 BVDV_1_SD0803                 | GQVLQGILWLLLITGVQG  | 195 |
| E1 KX987157.1 BVDV_1_SLO/1170/2000          | GQVLQGILWLLLITGVQG  | 195 |
| E1 LT631725.1 BVDV_1_UM/126/07              | GQVLQGILWLLLITGVQG  | 195 |
| E1 KF896608.1 BVDV_1_Bega-like              | GQVLQGILWLLLITGVQG  | 195 |
| E1 M96751.1 BVDV_1_SD1                      | GQVVGILWLLLITGVQG   | 195 |
| E1 KC757383.1 BVDV_1_10JJ-SKR               | GQVVGQVIWLLLITGVQG  | 195 |
| E1 AF526381.3 BVDV_1_ZM-95                  | GQVLQGVWLWLLLITGAQG | 195 |
| E1 KP941591.1 BVDV_1_USMARC-55925           | GQVLQGILWLILITGAQG  | 195 |
| E1 LC089876.1 BVDV_1_Shitara/02/06          | GQVLQGILWLLLITGVQG  | 195 |
| E1 KC853441.1 BVDV_1_SuwaCp                 | GQILQGILWLLLITGVQG  | 195 |
| E1 KX577637.1 BVDV_1_SLO/2407/2006          | GQVLQGVWLWLLLITGVQG | 195 |
| E1 KP313732.1 BVDV_1_Carlito                | GQMLQGILWLLLITGVQG  | 195 |
| E1 FJ040215.1 BVDV_3_Th/04_KhonKaen         | GQIVQGVIWLLLITGAQG  | 195 |
| E1 KC297709.1 BVDV_3_LVRI/cont-1            | GQIVQGVIWLLLITGAQG  | 195 |
| E1 KC788748.1 BVDV_3_Italy-129/07           | GQIVQGVIWLLLITGAQG  | 195 |
| E1 JX469119.1 BVDV_3_JS12/01                | GQIVQGVIWLLLITGAQG  | 195 |
| E1 JX985409.1 BVDV_3_CH-KaHo/cont           | GQIVQGVIWLLLITGAQG  | 195 |
| E1 AB871953.1 BVDV_3_D32/00_'HoBi'like      | GQIVQGVIWLLLITGAQG  | 195 |

|                                                 |                     |     |
|-------------------------------------------------|---------------------|-----|
| E1 HQ231763.1 BVDV_3_Italy-1/10-1               | GQIVQGVWLLLLITGAQG  | 195 |
| E1 JQ612704.1 BVDV_3_Italy-83/10-ncp            | GQIVQGVWLLLLITGAQG  | 195 |
| E1 NC_018713.1 BVDV_3_LV03/12                   | GQIVQGVWLLLLITGAQG  | 195 |
| E1 KJ660072.1 Pestivirus_PG-2                   | GQVWQGIWLLLLVTGAQG  | 194 |
| E1 MH410816.1 Pestivirus_PG-2_GIRAFFE           | GQVWQGIWLLLLVTGAQG  | 194 |
| E1 AF144617.2 Pestivirus_giraffe-1_H138         | GQVIQGIWLLLLVTGAQG  | 195 |
| E1 KJ463422.1 BDV_FNK2012-1                     | GQVWQGLWLLLLVTGAQG  | 195 |
| E1 U70263.1 BDV_BD31                            | GQVWQGLWLLLLVTGAKG  | 195 |
| E1 KF925348.1 BDV_Coos_Bay-5_nc                 | GQVWQGLWLLLLVTGAQG  | 195 |
| E1 AB897785.1 BDV_X818                          | GQVWQGLWLLLLVTGAQG  | 195 |
| E1 AF144618.2 Pestivirus_reindeer-1_V60-Krefeld | GQIVQGLIWLLLLVTGANG | 195 |
| E1 KC963426.1 BDV_JSLS12-01                     | GQVWQGLLWLFLVTGAQG  | 195 |
| E1 AF407339.1 BDV_Aveyron                       | GQLIQGLIWLLLLVTGAQG | 195 |
| E1 AY646427.1 CSFV_94.4/IL/94/TWN               | GQVWQGVWLLLLVTGAQG  | 195 |
| E1 KP233070.1 CSFV_GXF29/2013                   | GQVWQGVWLLLLVTGAQG  | 195 |
| E1 KC851953.1 CSFV_IND/UK/LAL-290               | GQIVQGIIWLLLLVTGAQG | 195 |
| E1 AF407339.1 CSFV_39                           | GQVWQGIIWLLLLVTGAQG | 195 |
| E1 FJ529205.1 CSFV_Zj0801                       | GQVWQGIIWLLLLVTGAQG | 195 |
| E1 KJ619377.1 CSFV_Bergen                       | GQVWQGIIWLLLLVTGAQG | 195 |
| E1 KU504339.1 CSFV_GD19/2011                    | GQVWQGIIWLLLLVTGAQG | 195 |
| E1 KM362426.1 CSFV_IND/AS/GHY/G4                | GQVWQGVWLLLLVTGAQG  | 195 |
| E1 GQ923951.1 CSFV_SXCDK                        | GQIVQGIIWLLLLVTGAQG | 195 |
| E1 J04358.2 CSFV_Alfort/Tuebingen               | GQVWQGIIWLLLLVTGAQG | 195 |
| E1 AY259122 CSFV_Alfort/Tuebingen               | GQVWQGIIWLLLLVTGAQG | 195 |
| E1 KF669877.1 CSFV_JJ9811                       | GQIVQGVWLLLLVTGAQG  | 195 |
| E1 X87939.1 CSFV_Alfort/187                     | GQIVQGVWLLLLVTGAQG  | 195 |
| E1 X87939 CSFV_Alfort/187                       | GQIVQGVWLLLLVTGAQG  | 195 |
| E1 KJ660072.1 CSFV_Riems                        | GQIVQGVWLLLLVTGAQG  | 195 |
| E1 GU270877.1 BDV_H2121_Chamois-1               | GQIVQGLIWLLLLVTGAQG | 195 |
| E1 KF918753.1 BDV_Gifhorn_genotype-3            | GQVWQGLIWLLLLVTGAQG | 195 |
| E1 JX428945.1 Pestivirus_Aydin/04-TR            | GQVIQGIIWLLLLVTGAQG | 195 |
| E1 AF037405.1 Pestivirus_Aydin/04-TR            | GQVIQGIIWLLLLVTGAQG | 195 |
| E1 KM408491.1 Pestivirus_Burdur/05-TR           | GQVIQGAIWLLLLVTGAQG | 195 |
|                                                 | ** :*. *::: ...     |     |

PLEASE NOTE: Showing colors on large alignments is slow.
